# Supplementary material for: Expanding the Sediment Transport Tracking Possibilities in a River Basin through the Development of a Digital Platform—DNS/SWAT
Source: MDPI journal article supplement (doi:10.3390/app12083848), 2022-04-11
Supplement: s1 [file s1]

Archive with 1 entries (1 files):
- applsci-1640787-supplementary.pdf
