# Supplementary material for: Expanding the Sediment Transport Tracking Possibilities in a River Basin through the Development of a Digital Platform—DNS/SWAT
Source: MDPI journal article supplement (doi:10.3390/app12083848), 2022-04-11
Supplement: s1 [file s1 › applsci-1640787-supplementary.pdf]

## Supplementary Materials

to the article " Expanding the sediment transport tracking possibilities in a river basin through the development of a digital platform - DNS/SWAT"

Table S1. Classification of value ranges for statistical measures used during calibration and validation.

| Performance rating | $R^2$          | NSE                   | PBIAS %                        |                                | KGE            |
|--------------------|----------------|-----------------------|--------------------------------|--------------------------------|----------------|
|                    | flow/sediments | flow/sediments        | sediments                      | flow                           | flow/sediments |
| very good          | >0.65          | $0.75 < NSE \leq 1$   | $< \pm 25$                     | $< \pm 10$                     | >0.75          |
| good               | 0.5 – 0.65     | $0.5 < NSE \leq 0.75$ | $\pm \leq 25$ Pbias $< \pm 40$ | $\pm \leq 10$ Pbias $< \pm 15$ | 0.5 - 0.75     |
| satisfactory       | 0.2 – 0.5      | $0 < NSE \leq 0.5$    | $\pm 40 \leq$ Pbias $< \pm 70$ | $\pm 15 \leq$ Pbias $< \pm 25$ | 0 - 0.5        |
| nonsatisfactory    | <0.2           | $NSE \leq 0$          | Pbias $\geq \pm 70$            | Pbias $\geq \pm 25$            | <0             |

Table S2. The Raba River Model calibration and validation results.

| calculation profile | type     | interval  | $R^2$ | NSE  | PBIAS | KGE  |
|---------------------|----------|-----------|-------|------|-------|------|
| Calibration         |          |           |       |      |       |      |
| Myślenice           | flow     | 1993-2017 | 0.62  | 0.51 | 21%   | 0.70 |
|                     | sediment | 2005-2017 | 0.34  | 0.10 | -2%   | 0.58 |
| Proszówki           | flow     | 1993-2017 | 0.73  | 0.73 | 4%    | 0.80 |
|                     | sediment | 2005-2017 | 0.77  | 0.71 | 27%   | 0.69 |
| Validation          |          |           |       |      |       |      |
| Stradomka           | flow     | 1993-2017 | 0.57  | 0.46 | -14%  | 0.72 |
|                     | sediment | 2005-2017 | 0.45  | 0.35 | 39%   | 0.19 |
